1 **ORIGINAL ARTICLE**

2 **Phylogenetic Pattern of Genetic Clusters, Paradigm Shift on Spatio-temporal Distribution of**  
3 **Clades, and Impact of Spike Glycoprotein Mutations of SARS-CoV-2 Isolates from India**

4  
5 Srinivasan Sivasubramanian<sup>1</sup>, Vidya Gopalan<sup>1</sup>, Kiruba Ramesh<sup>1</sup>, Padmapriya Padmanabhan<sup>1</sup>,  
6 Kiruthiga Mone<sup>1</sup>, Karthikeyan Govindan<sup>1</sup>, Selvakumar Velladurai<sup>1</sup>, Kaveri Krishnasamy<sup>1</sup>, Satish  
7 Srinivas Kitambi<sup>2,\*</sup>

8  
9 <sup>1</sup> State Viral Research and Diagnostic Laboratory (VRDL) Unit, Department of Virology, King  
10 Institute of Preventive Medicine and Research, Chennai, Tamil Nadu, India – 600 032.

11 <sup>2</sup>:Instituet for Healthcare Education and Translational Sciences (IHETS), Hyderabad, Telengana  
12 -500026.

13  
14  
15 **\*Corresponding author. Dr. Satish Srinivas Kitambi**

16 Institute for Healthcare Education and Translational Sciences (IHETS)

17 10-2-311, Plot 187, Str4, Cama Manor, West Marredpally, Telengana 500026.

18 **Email address: [satish.kitambi@klife.info](mailto:satish.kitambi@klife.info)**

19  
20 **Running Title:** Analyses of SARS-CoV-2 isolates from India

21 **Keywords:** SARS-CoV-2, COVID-19, Spike protein, Clade, Phylogeny, Mutations, India

22

23 **Abstract**

24 **Background:** The COVID-19 pandemic is associated with high morbidity and mortality, with  
25 the emergence of numerous variants. The dynamics of SARS-CoV-2 with respect to clade  
26 distribution is uneven, unpredictable and fast changing. **Aims:** Retrieving the complete genomes  
27 of SARS-CoV-2 from India and subjecting them to analysis on phylogenetic clade diversity,  
28 Spike (S) protein mutations and their functional consequences such as immune escape features  
29 and impact on infectivity. **Methods:** Whole genome of SARS-CoV-2 isolates (n=4,326)  
30 deposited from India during the period from January 2020 to December 2020 is retrieved from  
31 GISAID and various analyses performed using *in silico* tools. **Results:** Notable clade dynamicity  
32 is observed indicating the emergence of diverse SARS-CoV-2 variants across the country. GR  
33 clade is predominant over the other clades and the distribution pattern of clades is uneven.  
34 D614G is the commonest and predominant mutation found among the S-protein followed by  
35 L54F. Mutation score prediction analyses reveal that there are several mutations in S-protein  
36 including the RBD and NTD regions that can influence the virulence of virus. Besides, mutations  
37 having immune escape features as well as impacting the immunogenicity and virulence through  
38 changes in the glycosylation patterns are identified. **Conclusions:** The study has revealed  
39 emergence of variants with shifting of clade dynamics within a year in India. It is shown uneven  
40 distribution of clades across the nation requiring timely deposition of SARS-CoV-2 sequences.  
41 Functional evaluation of mutations in S-protein reveals their significance in virulence, immune  
42 escape features and disease severity besides impacting therapeutics and prophylaxis.

43

44

45

## 46 INTRODUCTION

47 Analyses of global and Indian SARS-CoV-2 genome sequences (as on December 2020) have  
48 revealed that the virus has differentially distributed into at least 10 clades and is continuously  
49 evolving.<sup>[1]</sup> The S-protein of SARS-CoV-2 targets angiotensin-converting enzyme 2 (ACE2)  
50 receptor for its entry into target cells. This protein is the major focus of the vaccine development  
51 platforms. Changes in the O- and N- linked glycosylation patterns of the S protein have an  
52 impact on the immunogenicity and virulence of the virus. Hence, it is important to closely  
53 monitor antigenic evolution of the S-protein in the circulating viruses. In this study, we retrieved  
54 complete genomes of SARS-CoV-2 from India during the whole year period from GISAID and  
55 subjected them to the studies on clade analyses and clade distribution pattern covering all states  
56 of the country. Further, mutations in various regions of S-protein, mutation frequency,  
57 glycosylation patterns, and the effects on protein structure, immunity and virulence were  
58 analysed.

59

## 60 METHODS

### 61 Genome data retrieval, phylogenetic and clade analysis

62 A total of 4326 annotated SARS CoV-2 whole genome sequences (WGS) from various parts of  
63 India deposited as on 31<sup>st</sup> December 2020 in Global Initiative on Sharing All Influenza Data  
64 (GISAID)(<https://www.gisaid.org/>) were retrieved. Sequences were aligned using MAFFT  
65 (Multiple Alignment using Fast Fourier Transform) with SARS-CoV-2 Wuhan-Hu-1 strain  
66 (NC\_045512.2) and GISAID reference sequence (EPI\_ISL\_402124)<sup>[2]</sup> used as reference. The  
67 Nextclade-Nextstrain pipeline (<https://clades.nextstrain.org/>) was used for studies on  
68 phylogenetic analysis and clustering patterns of the S gene.<sup>[3]</sup> Further, the Average evolutionary

69 divergence was estimated using Kimura-2 parameter model. Evolutionary analyses and  
70 phylogenetic tree construction were performed using MEGA-X.<sup>[4]</sup>

71

## 72 **Frequency and functional evaluation of variants**

73 Frequencies and amino-acid variants were analyzed using COVID CG and Tracking mutation  
74 tools (source GISAID) respectively. Functional consequences were predicted using tools like  
75 SIFT (Sorting Intolerant from Tolerant)  
76 ([https://sift.bii.aster.edu.sg/www/SIFT\\_seq\\_submit2.html](https://sift.bii.aster.edu.sg/www/SIFT_seq_submit2.html)),<sup>[5]</sup> PROVEAN (Protein Variation  
77 Effect Analyzer) ([http://provean.jcvi.org/seq\\_submit.php](http://provean.jcvi.org/seq_submit.php))<sup>[5]</sup> and PolyPhen-2 (Polymorphism  
78 Phenotyping v2) (<http://genetics.bwh.harvard.edu/pph2>).<sup>[6]</sup> A SIFT score of 0.0 to 0.05 indicates  
79 a deleterious effect. The functional effects of protein variants were assessed using the  
80 PROVEAN web server, using a default threshold value of  $-2.5$  and the values below and above  
81 the threshold value are considered as deleterious and tolerant respectively. A PolyPhen threshold  
82 scores of  $> 0.908$ ,  $>0.446$  and  $\leq 0.908$  and  $\leq 0.446$  are interpreted as “Probably Damaging”,  
83 “Possibly Damaging” and “Benign” respectively. ESC\_Comprehensive resource of immune  
84 escape variants in SARS-COV-2 was used to detect the escape mutants in S-protein  
85 (<http://clingen.igib.res.in/esc/>).<sup>[7]</sup>

86

## 87 **RESULTS**

88 The retrieved WGS were found to be classified under 7 clusters according to GISAID Clade  
89 identification [Figure 1].<sup>[8]</sup> It was observed that the predominant cluster encompassed 1,755  
90 (40.56%) of genomes that fell under the GR clade [Figure 1a]. Though this clade was  
91 represented by samples derived from various states across India, Maharashtra (n = 922) and

92 Telangana (n = 492) states had the maximum numbers followed by Karnataka (n = 102) [Figure  
93 1b]. The major clade GR was followed by clades G (942; 21.77%), O (783; 18.1%), GH (737;  
94 17.03%), S (82; 1.9%), L (25; 0.58%) and V (3; 0.07%). The clade G was mainly represented by  
95 samples from Maharashtra (n = 277), Gujarat (n = 215) and West Bengal (n = 152). The O clade  
96 is prevalent in all states of the country. Gujarat state accounts for the highest number of samples  
97 under GH clade [Figure 1b]. States such as Andhra Pradesh, Punjab and Rajasthan submitted a  
98 smaller number of sequences and the clade diversity pattern could not be clearly deciphered.

99

100 The viruses belonging to L, S and O clades were prevalent during the initial months (January  
101 to February, 2020) [Figure 1c]. During the starting of the pandemic (March to April), O clade  
102 was predominant followed by G, GR, GH, S and L. It is noteworthy that the distribution of S and  
103 L clades were drastically reduced during this period and the strains belonged to clades O, S, L  
104 and V were remarkably low in numbers during the progress of pandemic. From May to October,  
105 GR clade is predominant but becomes second to GH clade during November and December.  
106 Notably, the O clade was slowly dominated by GR, G and GH clades in different states during  
107 the course of pandemic and there was almost near to complete absence of O clade during  
108 November and December. The phylogenetic tree depicting clade diversity throughout the year  
109 shows that GR is the dominant clade over the others [Figure 2]. These results suggested  
110 spatiotemporal clade diversity and a paradigm shift in phylodynamics of clade distribution.

111

### 112 **Mutation analysis of spike protein from Indian strains**

113 A total of 557 amino acid substitution mutations were found in S-protein among the 4,326 Indian  
114 strains [Supplementary File 1]. There were 333 and 215 mutations present in the S1 and S2

115 domains respectively with the highest number of mutations in the N-terminal domain (NTD; 211  
116 mutations) followed by the RBD (63 mutations) [Table 1]. Nine mutations are identified in  
117 signal peptide, which is not the component of mature S protein. Among these 557 mutations,  
118 D614G was present in 79.99% (n = 3461) of Indian strains followed by L54F (n=111, 2.57%)  
119 isolates. The other prominent mutation sites were: Q677 (72), P681 (54), P812 (40), A771 (34),  
120 Q675 (30), and L5 (26) [Figure 3]. Besides, 11 types of mutations are found in the 8 sites of  
121 highly conserved protease cleavage region (from 675 to 692 of S1 and S2 domains) of the  
122 protein. L18F, H69del, V70del, D138Y and Y144del mutations were observed in NTD of S-  
123 protein of few isolates and these mutations could enhance the surface electropositivity of the S-  
124 protein and thereby facilitating the adhesion of virus to negatively charged lipid raft gangliosides  
125 of host cells.<sup>[9]</sup> It is also observed that two of the study variants possess H69del, V70del and  
126 Y144del in NTD and N501Y in RBD suggesting the improved affinity as well as adhesive  
127 properties of S-protein due to the concomitant mutations in both regions that synergistically  
128 promote virus host interaction.

129

130 The frequency of amino acid mutations in S-protein was analyzed using COVID-19 CoV  
131 Genetics browser (source: GISAID), and the results showed that non-synonymous mutations  
132 were scattered across the S-gene with region specific varying frequency [Supplementary File 2].  
133 Figure 4 shows prevalent mutations such as D614G, Q677H and P681H originated during  
134 March, April and July respectively and their appearance was observed till the end of the year  
135 2020. On contrary, L54F as well as K77M and P812L mutations emerged during April and June  
136 respectively but absent after few months of their appearance.

137

138 Many amino acid mutations were observed to be region specific namely F32Y, T33K and  
139 G35Q mutations (in Karnataka); T29I and P681H (Maharashtra); and L7S, L54F, R78M,  
140 Q690H, A701T and A879S (Gujarat). These mutations were absent from other states indicating  
141 that these mutations might not spread to other states possibly due to effective implementation of  
142 lockdown measures throughout the country. Some distinct amino acid variants were observed in  
143 Gujarat and Maharashtra (G181A) and V622F in Telangana and Orissa. There were 12  
144 premature stop codons and 8 deletion mutations present in different positions of various S-gene  
145 sequences. More than one mutation type can be observed at the same position in the protein. For  
146 instance, amino acid A to V, E, S, or K, at position 27, A to G, T, S, or V at position 222. Among  
147 the total 419 mutation sites in S-protein of Indian isolates, 114 sites carry more than one  
148 mutation. It is noteworthy that there were 190 distinct mutation events that occurred in India first  
149 time; among them, 115 mutation events were confined only to India and the rest of 75 mutations  
150 were subsequently identified in various countries or occurred independently at different  
151 geographical regions across the world [Supplementary File 2].

152

### 153 **Immune escape mutations in spike protein**

154 The analyses showed 11 and 17 immune escape mutations in the NTD and RBD of S-protein  
155 respectively [Supplementary File 3]. L18F, T19A, D80N, D138Y, Y144del, Y145del, K147E,  
156 N148S, W152L, Q218H and S255F were found in NTD, and among them, L18F, Y144del,  
157 Y145del and N148S and W152L were shown to display resistance to neutralizing antibodies.  
158 Among the mutations in RBD, R346K, N440K, G446V, N450K, V483F, E484K, E484Q, F490S  
159 and S494P also showed change in ACE2 binding to the extent of 75% to 90%.<sup>[10,11]</sup> Variants

160 identified with mutations at sites such as E484 (E484Q), F490 (F490S), Q493 (Q493STOP), and  
161 S494 (S494P) in the RBD are presumed to have immune escape features.<sup>[12]</sup>

162

163 Mutations in regions of S-protein other than RBD also can show resistance to antibody  
164 and are identified in the present study. It is noteworthy that single amino acid changes such as  
165 Y145del, F490S, A831S and double amino acid changes including D614G+A879S,  
166 D614G+A879T, and D614G+M1237I were reported to be resistant to convalescent sera or these  
167 mutations could confer the S protein monoclonal antibody resistance, whereas V367F of the  
168 RBD was reported to have increased sensitivity to neutralizing antibodies.<sup>[13]</sup> Other mutations  
169 M153I, S254F, and S255F identified in the study are found to reduce the affinity between S-  
170 protein and antibodies.<sup>[14]</sup>

171

### 172 **Mutations affecting glycosylation patterns**

173 Analysis of both N- linked (NGS) and O-linked glycosylation sites (OGS) was performed for S-  
174 protein of 4326 isolates. Among the total 22 and 26 amino acid sites of S-protein carrying with  
175 NGS and OGS moieties respectively, it was observed that 7 and 9 of these sites were found to  
176 possess mutations that resulted in loss of glycosylation moiety [Figure 5]. All except one variants  
177 possessed only one amino acid glycosylation site change either NGS or OGS. One variant  
178 (EPI\_ISL\_479737) had lost both OGS and NGS sites due to mutations such as T602L and  
179 N603Y [Table 2]. There were two NGS present in RBD without any mutation; among the four  
180 OGS in RBD, only one glycosylation mutation (T323I) was observed.

181

182



183 **Functional evaluation of the S protein mutations**

184 Among the total 557 amino acid mutations of S-protein, 531 mutations were taken up for score  
185 prediction studies and the remaining 26 mutations observed either as stop codons (STOP) or  
186 deletions (del). SIFT score predicted 124 mutations to be deleterious and other mutations to be  
187 neutral. Also, PROVEAN score predicted 63 mutations to be deleterious whereas POLYPHEN-2  
188 predicted 213 mutations that could display probably damaging effect. Only 41 amino acid  
189 mutations were predicted to result in potentially deleterious functional consequences by all three  
190 of the mutation score prediction tools [Supplementary File 4].

191

192 **Phylogenetic analysis of spike protein**

193 Only 250 S-protein sequences constituting unique mutations were selected for phylogenetic tree  
194 construction, and the analysis showed that there was high degree of heterogeneity with multiple  
195 clusters and sequences were highly diverged from the reference sequence [Figure 6]. Estimates  
196 of Average Evolutionary Divergence of sequence pairs comprising 4312 S-genes showed the  
197 evolutionary rate as  $5.4 \times 10^{-4}$  substitution/site/year (s/s/y).

198

199 **DISCUSSION**

200 Continuous monitoring of the virus locally and globally is needed for devising effective  
201 measures to handle the pandemic crisis. In this study, we report the molecular epidemiological  
202 features of SARS-CoV-2 based on WGS in GISAID deposited from India including the  
203 dynamics of clade distribution and diversity, amino acid mutations in S-protein and their impact  
204 on virulence, immune evading responses and glycosylation patterns.

205

206 The study showed that the GR was predominant and was followed by clades G, O, GH, S,  
207 L and V. Though there were only four SARS-CoV-2 clades such as ‘L’, ‘S’, ‘G’, and ‘V’ during  
208 the early pandemic phase, swift genetic diversity of the virus and its rapid pace of evolution  
209 facilitated GISAID to continuously update the classification by inclusion of three more clades  
210 such as GH’, ‘GR’ and ‘GV’. Besides, all unclassified sequences of SARS-CoV-2 strains are  
211 grouped as ‘O. It is observed that there are only few studies on phylogenetic analyses of SARS-  
212 CoV-2 from India. A recent study from India reported that the major cluster of SARS-CoV-2  
213 was A2a (PANGOLIN lineage B.1/B.1.1/B.1.36) (83%) followed by a distinct A3i clade  
214 (PANGOLIN lineage B.6) (11.6%).<sup>[5,15]</sup> Another phylogenetic study on Indian SARS-CoV-2  
215 revealed the presence of four major clades, *i.e.*, 19A (n = 18.4%), 19B (n = 17%), 20A (n =  
216 34.43%), 20B (n = 28.3%), and one minor clade 20C (n = 1.9%).<sup>[16]</sup> These reports suggested that  
217 Europe and Southeast Asia as two major routes for introduction of the virus in India followed by  
218 local transmission. Both the predominant G and GR are European clades and the strains of these  
219 clades possess the D614G mutation on the S-protein which is more infectious.<sup>[16,17]</sup>

220

221 The month-wise clade distribution analysis showed that L, S and O clades were prevalent  
222 in the country during the early phase of pandemic; subsequently, G, GR, and GH clades became  
223 prevalent over them. The prevailing clades in the country could be attributed to the early  
224 invasion of strains into India through travelers and subsequent mixing of clades. Few reports  
225 with minimal sequences deposited till July 2020 only revealed the presence of few clades such as  
226 A2a, A3, B and O in India and among them A2a (related to GISAID clade G) was predominant  
227 following A3, O and B.<sup>[5,17,18]</sup> The present study observes ever-changing genetic diversity with  
228 intense clade dynamicity of the virus throughout the year.

229

230           Substitution mutations in S protein of all the Indian SARS-CoV-2 sequences were  
231 analysed with reference to SARS-CoV-2 Wuhan-Hu-1 strain. The origin of D614G mutation was  
232 in China during January, 2020 but the occurrence in India was reported in March and became  
233 prevalent afterwards. The first occurrence of L54F was observed in Wuhan in March whereas  
234 India reported in April. The protease cleavage region S1/S2 in the S protein is essential for the  
235 virus to undergo proteolytic activation of S1 and S2 domains for receptor binding and viral-  
236 membrane fusion. The region is highly conserved at sites 685 and 686 where proteolytic  
237 cleavage occurs. The study has identified 11 mutations flanking the proteolytic cleavage site.  
238 Inferences from the proteolytic cleavage of the S glycoprotein suggest the capability of virus to  
239 possess features such as cross species mobility or tropism towards different cells.<sup>[19]</sup> There are  
240 166 mutation sites observed in Asia with 181 mutation types.<sup>[20]</sup> However, the present study  
241 observes that there are 419 mutation sites in the protein with 557 mutation types meaning that  
242 several sites in the protein carry more than one mutation type.

243

244           Though D614G is associated with increased infectivity, mutations such as Q239R, T719I,  
245 T719S, D839Y, P1263L, mutations in RBD such as I434K and P521S, and D614G+Q675H are  
246 reported to have decreased infectivity.<sup>[13]</sup> Besides, D614G in combination with other mutations  
247 such as D614G+L54F (n = 23), D614G+V341I (n = 1), D614G+D936Y (n = 3), D614G+S939F  
248 (n = 9) and D614G+S943T (n = 2) in strains of the present study was demonstrated to have  
249 increased infectivity compared to Wuhan-1 strain.<sup>[13]</sup> A recent study has reported that L54F,  
250 D614G and V1176F of S-protein, identified in the study, are correlated with severe clinical  
251 outcome.<sup>[21]</sup> It was reported that mutations such as T29I, H49Y, D138Y, E484Q, E484K, A520S,

252 T572I, D614G and H1083Q identified in strains of the study, could increase the stability of S-  
253 protein.<sup>[6]</sup> In contrast, the report suggested that mutations such as L54F, G431S, E471D, G502R,  
254 Q506H, P507S, Y508N, E583D and Q675H could weaken the interaction of S-protein with  
255 ACE2 receptor; whereas, N440K, E471Q and G504V could improve the binding affinity.  
256 Emergence of strains of Variant of Concern (VOC), according to WHO nomenclature, such as  
257 Alpha (GISAID clade: GRY), Beta (GH/501Y.V2), Gamma (GR/501Y.V3) and Delta  
258 (G/452.V3) as well as Variant of Interest (VOI) such as Eta (G/484K.V3), Iota (GH/253G.V1)  
259 and Kappa (G/452R.V3) has been observed during the end of year 2020 and early 2021  
260 worldwide. Though few of these highly transmissible variants identified in India late 2020, the  
261 sequences of them were submitted to GISAID only in 2021 except two VOC Alpha strains  
262 (EPI\_ISL\_745197 and EPI\_ISL\_747244). Hence, the study does not report mutations and their  
263 features for these variants including the Delta variant that are likely responsible for the  
264 substantial surge in cases that began in the Western state of Maharashtra and spread throughout  
265 India from Jan, 2021 onwards.<sup>[22]</sup> This study observed that only 2 WGS of VOC strain (Alpha)  
266 from India were available in GISAID in the year 2020 and were taken for analysis.

267

268 Antibodies targeting the RBD are being developed as prophylactics. Determination of  
269 mutations in S-protein showing resistance to antibodies is crucial for assessing the antigenic  
270 implications of viral evolution. The study has identified immune escape mutations both in NTD  
271 and RBD of Indian isolates. Mutations especially in these domains evading the antibody  
272 recognition could result in the severity of infection. Presently, most of the SARS-CoV-2 genome  
273 is not under positive selection, but if neutralizing antibodies are widely deployed as  
274 prophylactics, positive selection pressure that lead to infection-competent viral mutants resulting

275 in resurgence of SARS-CoV-2 infections and pose challenges to prophylactic measures.<sup>[11]</sup>  
276 Virulence of SARS-CoV-2 can be associated with mutations in S-protein such as L18F, H69del,  
277 V70del, D138Y and Y144del that confer affinity and adhesive properties for better interaction  
278 with host cells through surface electrostatic interaction;<sup>[9]</sup> besides, these mutations are also  
279 reported to evade host immune responses against S-protein.<sup>[23]</sup> Though the present study  
280 particularly focuses on functional features of mutations in S-protein, epistatic interactions  
281 involving mutations from other genes can also play a role in clade diversity and spatio-temporal  
282 dynamics. Such interactions favor the coevolution of mutations due to selective pressures to form  
283 new clades that become dominant. The fitness of mutations in virulence and immune escape  
284 features are largely influenced not only by independent mutations in S-protein but also mutations  
285 through epistatic interactions. For instance, D614G appears along with 3 other mutations in  
286 5'UTR, NSP3 and NSP12 that form G clade.<sup>[24]</sup> VOC strains forming distinct clades have  
287 virulence features contributed by mutations in S gene and other genes.

288  
289 Glycosylation of S protein plays a vital role in virulence, S-protein folding, immune  
290 sensitivity as well as host immune evasion, and shaping viral tropism.<sup>[25]</sup> Analysis of both NGS  
291 and OGS of the study isolates showed mutations that resulted in loss of glycosylation moiety  
292 suggesting the reduced immunogenic potential of S-protein of mutant variants.<sup>[26]</sup> However,  
293 there is no report on the impact of the NGS mutation in the interaction of RBD with ACE  
294 receptor. S-protein of SARS-CoV-2 has 22 NGS and several OGS; but, in many strains of this  
295 study, several of these sites were lost due to amino acid mutations. There are studies that report  
296 absence of mutations at NGS in S-protein. It has been studied that certain mutations incurred in  
297 the NGS and OGS increase the stability of the S-protein.<sup>[6]</sup> Accordingly, in the present study, the

298 observed mutations in the NGS such as N234Y and N603Y and OGS mutations such as S221L,  
299 T323I, T602I and T602L are found to stabilize the S-protein. On the contrary, very few  
300 mutations at the NGS (N709K) and OGS (T1077I) were found to decrease the stability of S  
301 protein.<sup>[6]</sup> Also, glycosylation mutations such as N149G, N165S, and N709K are reported to  
302 increase the sensitivity to neutralizing antibodies and the mutation N234Y is found to reduce the  
303 neutralization sensitivity to different set of antibodies. The glycosylation mutation N1074D has  
304 been found to decrease the infectivity.<sup>[13]</sup>

305

306 Functional evaluation of 531 mutations in S-protein from Indian isolates reveals 41  
307 amino acid mutations that are predicted to have potential impact on functional consequences. A  
308 previous study on Indian SARS-CoV-2 isolates reported scores for D614G mutation in S-protein  
309 and several mutations across various proteins with their functional impact.<sup>[5]</sup> However, the  
310 present study reports scores for all mutations occurred in S-protein of Indian isolates that were  
311 predicted to be neutral, tolerated, deleterious, benign and probably damaging by means of using  
312 mutation score prediction tools. The evolutionary rate of S-gene was estimated to be  $5.4 \times 10^{-4}$   
313 substitution/site/year (s/s/y) through analysis of 4312 S-genes. Reports suggest that the genome  
314 have the evolutionary rate varying in the range between  $1.854 \times 10^{-4}$  and  $5.63 \times 10^{-3}$  s/s/y.<sup>[27-29]</sup> A  
315 study reported that the evolutionary rate for S-gene of SARS-CoV-2 was  $1.08 \times 10^{-3}$  s/s/y after  
316 nine months of pandemic.<sup>[30]</sup> Another study on Indian SARS-CoV-2 isolates reported the  
317 evolutionary rate for S-protein as  $3.55 \times 10^{-3}$  s/s/y employing sequences of 1376 isolates.<sup>[5]</sup>

318

319

320

321 **CONCLUSIONS**

322 The study has revealed a rapidly shifting of clade predominance and uneven distribution within a  
323 year of the introduction of SARS-CoV-2 in India. The evaluation of S protein reveals the  
324 significance of various mutations in virulence, immune escape features and disease severity  
325 besides their impact on therapeutics and prophylaxis.

326

327 **Acknowledgements**

328 The authors thank Department of Health Research (DHR), Govt of India for supporting State  
329 VRDL, King Institute of Preventive Medicine and Research, Chennai in this study. We  
330 acknowledge the GISAID EpiCov database and the contributors of genomic data for enabling the  
331 sequences available for the study.

332

333

334

335

336

337

338

339

340

341

342

343

344 **Conflicts of interest**

345 None

346

347 **Ethical approval**

348 None.

349

350 **Research Quality and Ethics Statement**

351 The authors of this manuscript declare that this scientific work complies with reporting quality,  
352 formatting and reproducibility guidelines set forth by the EQUATOR Network. The authors also  
353 attest that this clinical investigation was determined to not require the Institutional Review Board  
354 / Ethics Committee review, and the corresponding protocol/approval number is not applicable.  
355 We also certify that we have not plagiarized the contents in this submission and have done a  
356 Plagiarism Check. We also certify that none of the authors is a member of the Editorial board of  
357 the Journal of Global Infectious Diseases.

358

359

360

361

362

363

364

365

366



367 **REFERENCES**

368

- 369 1. Sun J, He WT, Wang L, Lai A, Ji X, Zhai X, *et al.* COVID-19: Epidemiology, Evolution,  
370 and Cross-disciplinary perspectives. *Trends Mol Med* 2020;26(5):483-95.
- 371 2. Elbe S, Buckland Merrett G. Data, disease and diplomacy: GISAID's innovative  
372 contribution to global health. *Glob Chall* 2017;1(1):33-46.
- 373 3. Hadfield J, Megill C, Bell SM, Huddleston J, Potter B, Callender C, *et al.* Nextstrain: real-  
374 time tracking of pathogen evolution. *Bioinformatics* 2018;34(23):4121-3.
- 375 4. Kumar S, Stecher G, Li M, Knyaz C, Tamura K. MEGA X: Molecular Evolutionary  
376 Genetics Analysis across Computing Platforms. *Mol Biol Evol* 2018;35(6):1547-1549.
- 377 5. Banu S, Jolly B, Mukherjee P, Singh P, Khan S, Zaveri L, *et al.* A distinct phylogenetic  
378 cluster of Indian SARS-CoV-2 isolates. *Open Forum Infect Dis* 2020;7(11):ofaa434.
- 379 6. Teng S, Sobitan A, Rhoades R, Liu D, Tang Q. Systemic effects of missense mutations on  
380 SARS-CoV-2 spike glycoprotein stability and receptor-binding affinity. *Brief Bioinform*  
381 2021;22(2):1239-53
- 382 7. Rophina M, Pandhare K, Shamnath A, Imran M, Jolly B, Scaria V. ESC - a  
383 comprehensive resource for SARS-CoV-2 immune escape variants. *bioRxiv* 2021.
- 384 8. Alm E, Broberg EK, Connor T, Hodcroft EB, Komissarov AB, Maurer-Stroh S, *et al.*  
385 Geographical and temporal distribution of SARS-CoV-2 clades in the WHO European  
386 Region, January to June 2020. *Euro Surveill* 2020;25(32):2001410.
- 387 9. Fantini J, Yahi N, Azzaz F, Chahinian H. Structural dynamics of SARS-CoV-2 variants: A  
388 health monitoring strategy for anticipating Covid-19 outbreaks. *J Infect* 2021;83(2):197-  
389 206.

- 390 10. Van Egeren D, Novokhodko A, Stoddard M, Tran U, Zetter B, Rogers M, *et al.* Risk of  
391 rapid evolutionary escape from biomedical interventions targeting SARS-CoV-2 spike  
392 protein. PLoS One 2021;16(4):e0250780.
- 393 11. Greaney AJ, Starr TN, Gilchuk P, Zost SJ, Binshtein E, Loes AN, *et al.* Complete  
394 mapping of mutations to the SARS-CoV-2 spike receptor-binding domain that escape  
395 antibody recognition. Cell Host Microbe 2021;29(1):44-57.e9.
- 396 12. Weisblum Y, Schmidt F, Zhang F, DaSilva J, Poston D, Lorenzi JC, *et al.* Escape from  
397 neutralizing antibodies by SARS-CoV-2 spike protein variants. Elife 2020;9:e61312.
- 398 13. Li Q, Wu J, Nie J, Zhang L, Hao H, Liu S, *et al.* The impact of mutations in SARS-CoV-2  
399 Spike on viral infectivity and antigenicity. Cell 2020;182(5):1284-94.e9.
- 400 14. Chen J, Gao K, Wang R, Wei GW. Prediction and mitigation of mutation threats to  
401 COVID-19 vaccines and antibody therapies. Chem Sci. 2021 Apr 13;12(20):6929-6948.
- 402 15. Jacob JJ, Vasudevan K, Veeraraghavan B, Iyadurai R, Gunasekaran K. Genomic evolution  
403 of severe acute respiratory syndrome Coronavirus 2 in India and vaccine impact. Ind J  
404 Med Microbiol 2020;38(2):210-2.
- 405 16. Raghav S, Ghosh A, Turuk J, Kumar S, Jha A, Madhulika S, *et al.* Analysis of Indian  
406 SARS-CoV-2 genomes reveals prevalence of D614G mutation in Spike protein predicting  
407 an increase in interaction with TMPRSS2 and virus infectivity. Front Microbiol  
408 2020;11:594928.
- 409 17. Pattabiraman C, Habib F, Rasheed R, Prasad P, Reddy V, Dinesh P, *et al.* Genomic  
410 epidemiology reveals multiple introductions and spread of SARS-CoV-2 in the Indian  
411 state of Karnataka. PLoS One 2020;15(12):e0243412.

- 412 18. Biswas NK, Majumder PP. Analysis of RNA sequences of 3636 SARS-CoV-2 collected  
413 from 55 countries reveals selective sweep of one virus type. *Indian J Med Res*  
414 2020;151(5):450-8.
- 415 19. Menachery VD, Dinnon KH, Yount BL, McAnarney ET, Gralinski LE, Hale A, *et al.*  
416 Trypsin Treatment Unlocks Barrier for Zoonotic Bat Coronavirus Infection. *J Virol*  
417 2020;94(5):e01774-19.
- 418 20. Guruprasad L. Human SARS CoV-2 spike protein mutations. *Proteins*. 2021;89(5):569-  
419 76.
- 420 21. Nagy A, Pongor S, Gyorffy B. Different mutations in SARS-CoV-2 associate with severe  
421 and mild outcome. *Int J Antimicrob Agents* 2021;57(2):106272.
- 422 22. Chatterjee P. Covid-19: India authorises Sputnik V vaccine as cases soar to more than 180  
423 000 a day. *BMJ* 2021;373:n978.
- 424 23. Harvey WT, Carabelli AM, Jackson B, Gupta RK, Thomson EC, Harrison EM, *et al.*  
425 SARS-CoV-2 variants, spike mutations and immune escape. *Nat Rev Microbiol.*  
426 2021;19(7):409-424.
- 427 24. Banoun H. Evolution of SARS-CoV-2: Review of Mutations, Role of the Host Immune  
428 System. *Nephron* 2021;145(4):392-403.
- 429 25. Watanabe Y, Berndsen ZT, Raghwani J, Seabright GE, Allen JD, Pybus OG, *et al.*  
430 Vulnerabilities in coronavirus glycan shields despite extensive glycosylation. *Nat*  
431 *Commun* 2020;11(1):2688.
- 432 26. Sanda M, Morrison L, Goldman R. N- and O-Glycosylation of the SARS-CoV-2 Spike  
433 protein. *Anal Chem* 2021;93(4):2003-9.

- 434 27. vanDorp L, Acman M, Richard D, Shaw LP, Ford CE, Ormond L, *et al.* Emergence of  
435 genomic diversity and recurrent mutations in SARS-CoV-2. *Infect Genet Evol*  
436 2020;83:104351.
- 437 28. Velazquez-Salinas L, Zarate S, Eberl S, Gladue DP, Novella I, Borca MV. Positive  
438 selection of ORF1ab, ORF3a, and ORF8 genes drives the early evolutionary trends of  
439 SARS-CoV-2 during the 2020 COVID-19 pandemic. *Front Microbiol* 2020;11:550674.
- 440 29. Motayo BO, Oluwasemowo OO, Olusola BA, Akinduti PA, Arege OT, Obafemi YD, *et*  
441 *al.* Evolution and genetic diversity of SARS-CoV-2 in Africa using whole genome  
442 sequences. *Int J Infect Dis* 2021;103:282-7.
- 443 30. Pereson MJ, Flichman DM, Martínez AP, Baré P, Garcia GH, Di Lello FA. Evolutionary  
444 analysis of SARS-CoV-2 spike protein for its different clades. *J Med Virol*  
445 2021;93(5):3000-6.

## Legends for Figures

**Figure 1.** SARS-CoV-2 clade distribution pattern in India. **(a)** Pie chart showing the proportion of various clades of the genomes deposited from India in GISAID; **(b)** Schematic geographical map showing the proportion and distribution of clades from different states of India; **(c)** Month wise clade distribution during the year 2020.

**Figure 2.** Phylogenetic tree showing clade diversity for SARS-CoV-2 Indian isolates. These isolates fall under 7 genetic clades with the majority falling under GR clade.

**Figure 3.** Amino acid mutations and their frequency in different regions of S proteins of SARS-CoV-2 isolates from India. Signal peptide (SP), N-terminal domain (NTD), Receptor binding domain (RBD), Protease cleavage site (PC), Fusion peptide (FP), Heptad repeat 1(HR1), Heptad repeat 2 (HR2), Transmembrane domain (TM), Cytoplasm domain (CT).

**Figure 4.** Distribution and frequency of the most prevalent mutations of S protein of SARS-CoV-2 isolates circulated in India during the year 2020. D614G is predominant throughout the year with high frequency followed by L54F mutation. D614G, Q677H and P681H mutations originated during the first half of the year and their appearance was observed throughout the year; L54F, K77M and P812L mutations emerged during the first half of the year but absent after few months of their appearance.

**Figure 5.** Frequency of amino acid mutations impacting O- and N-glycosylation patterns. Few sites such as S221, T602 and N1074 are having more than one mutation.

**Figure 6.** Phylogenetic tree of isolates having distinct mutations in the gene of S protein. The tree was constructed by Maximum-Likelihood method with the tree having the root as SARS-CoV-2 Wuhan-Hu-1 sequence (NC\_045512.2).

## **Legends for Tables**

**Table 1.** Aminoacid substitution mutations observed across various regions of S proteins of Indian SARS-CoV-2 isolates.

**Table 2.** N- and O-linked glycosylation sites of S protein of SARS-CoV-2 and amino acid mutations at these sites affecting the glycosylation pattern in Indian SARS-CoV-2 variants.

**Figure 1**

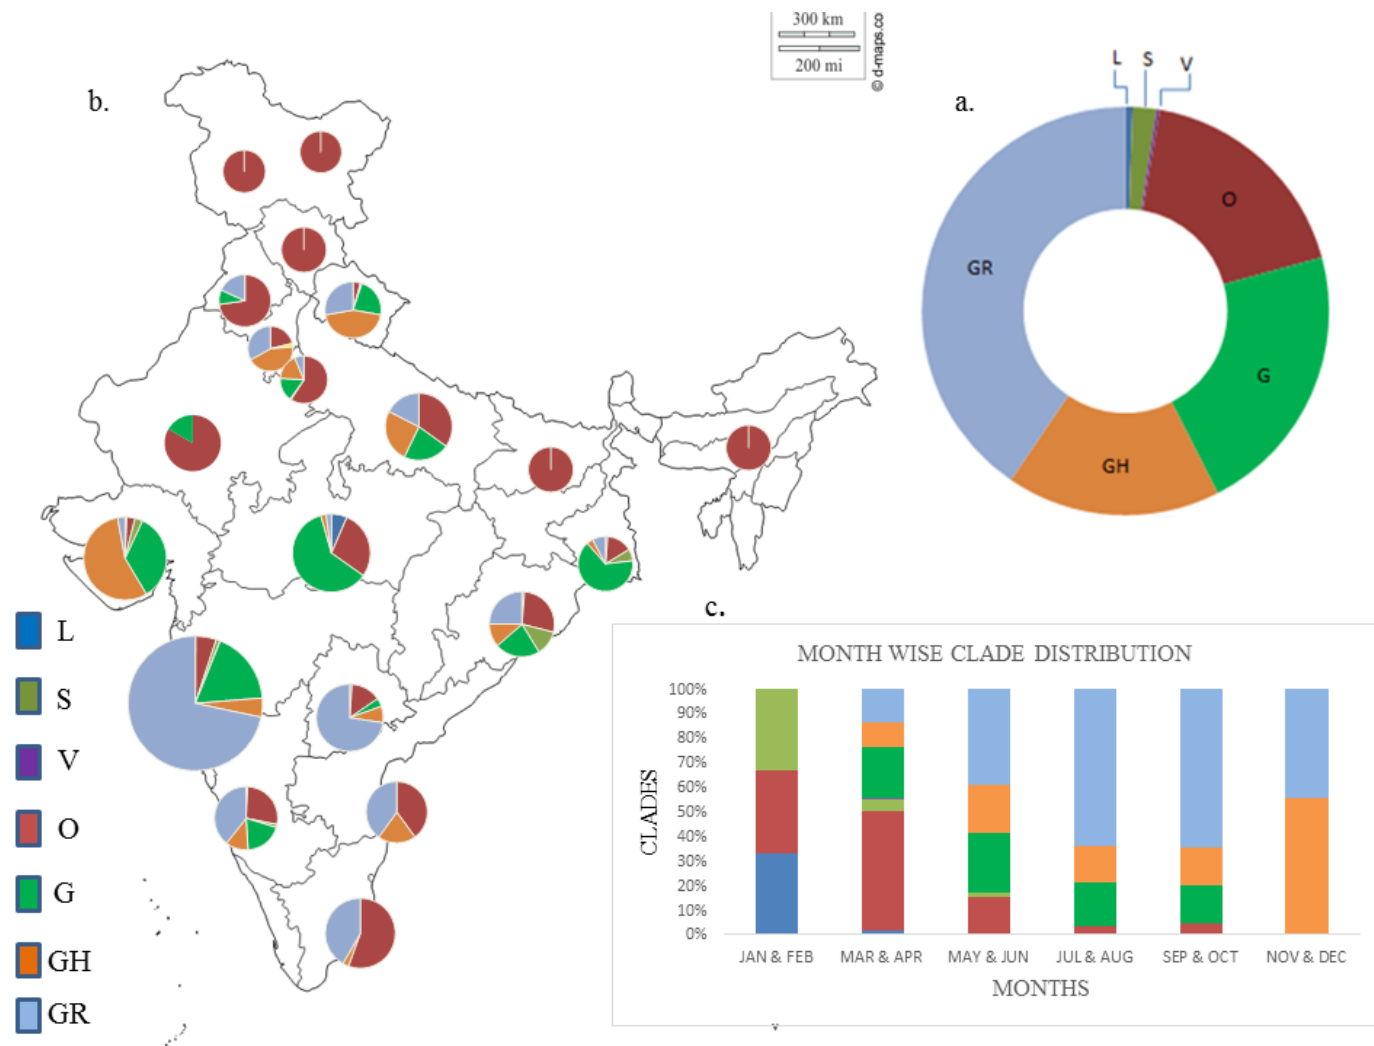

**Figure 2**

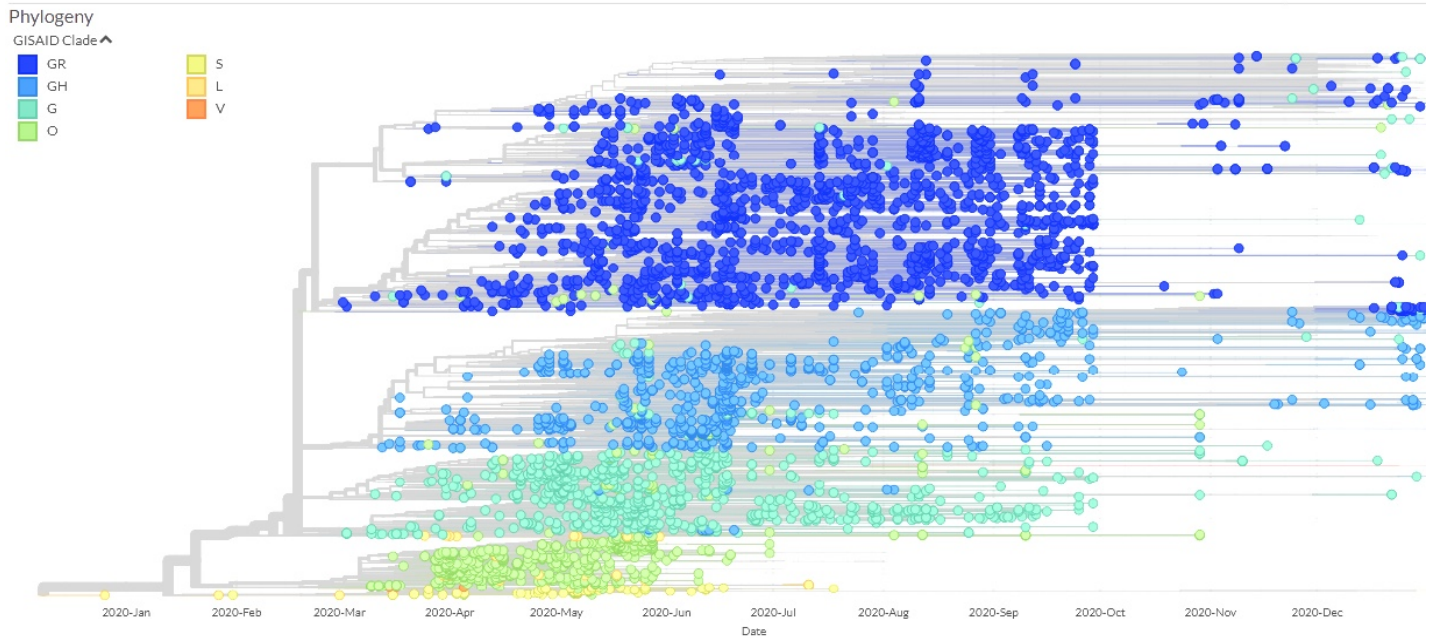



**Figure 3**

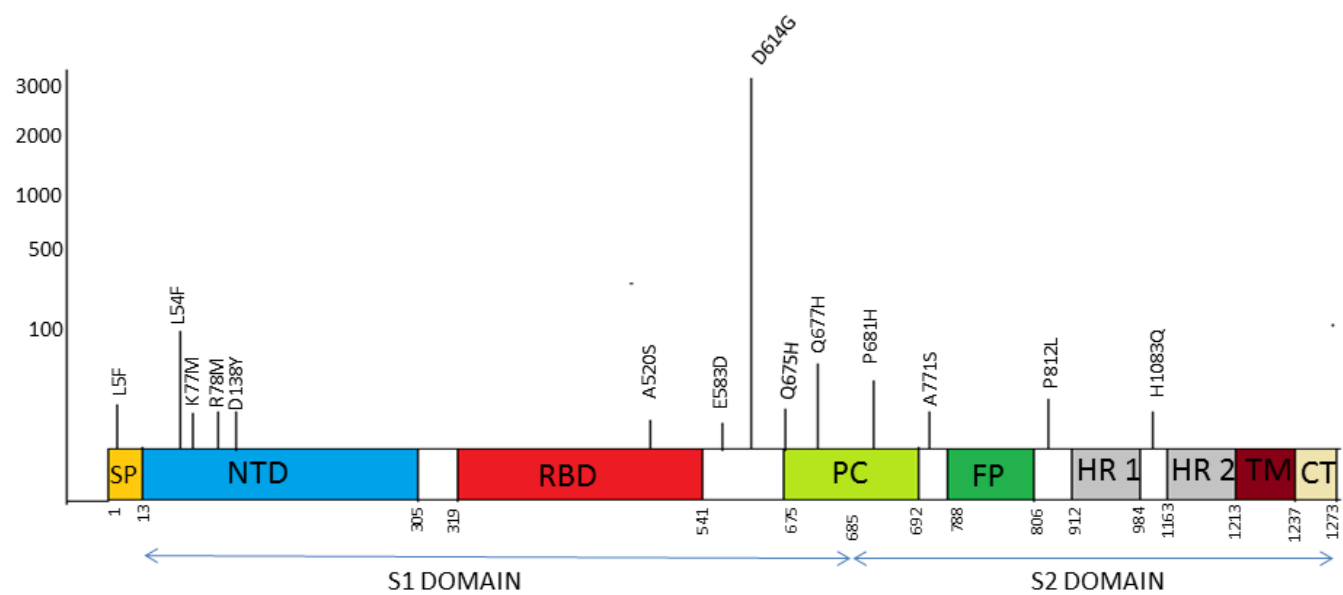

Figure 4

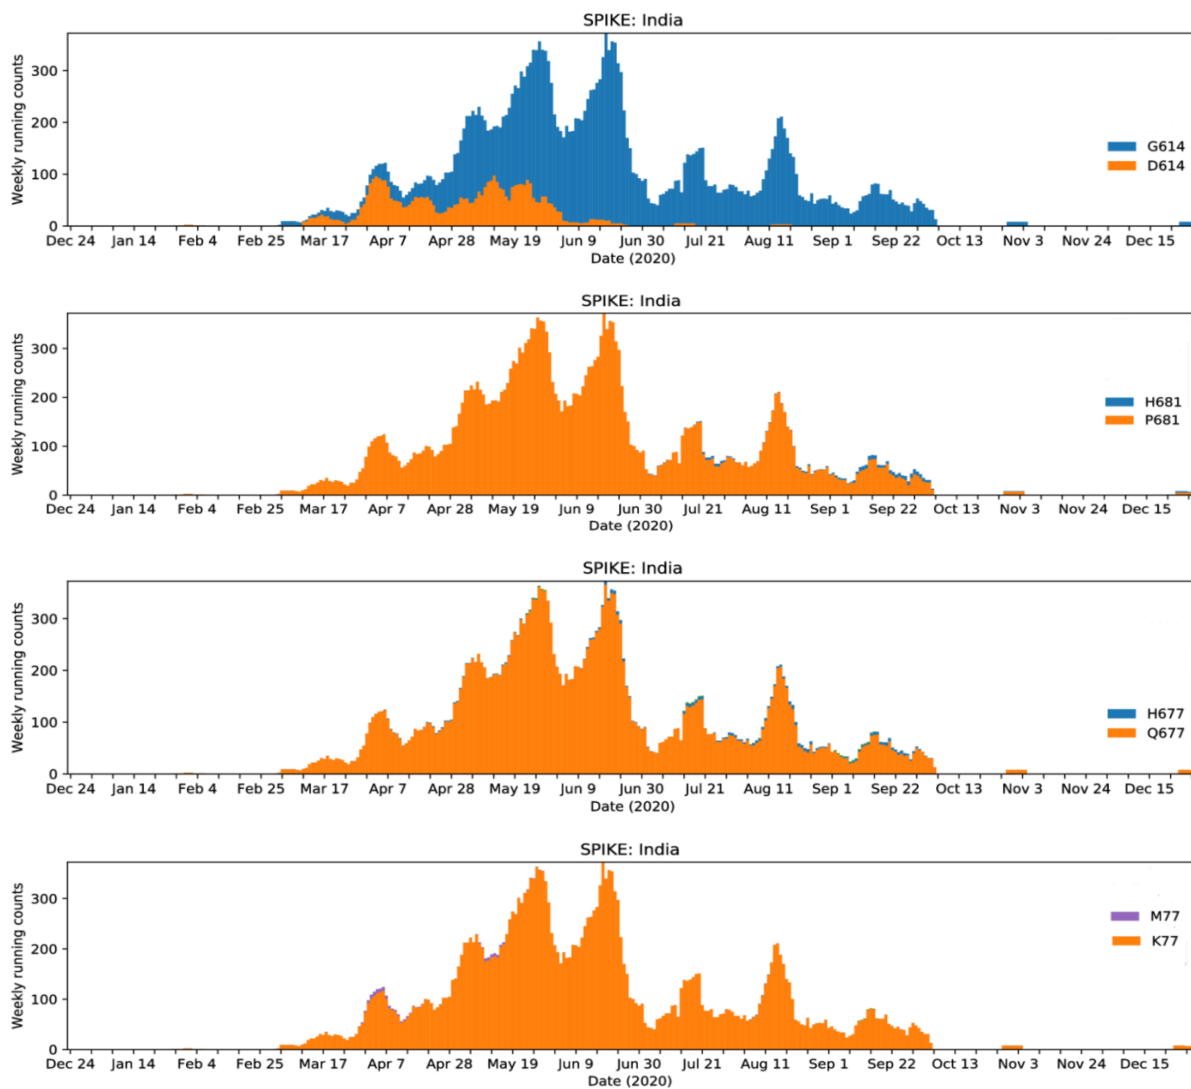

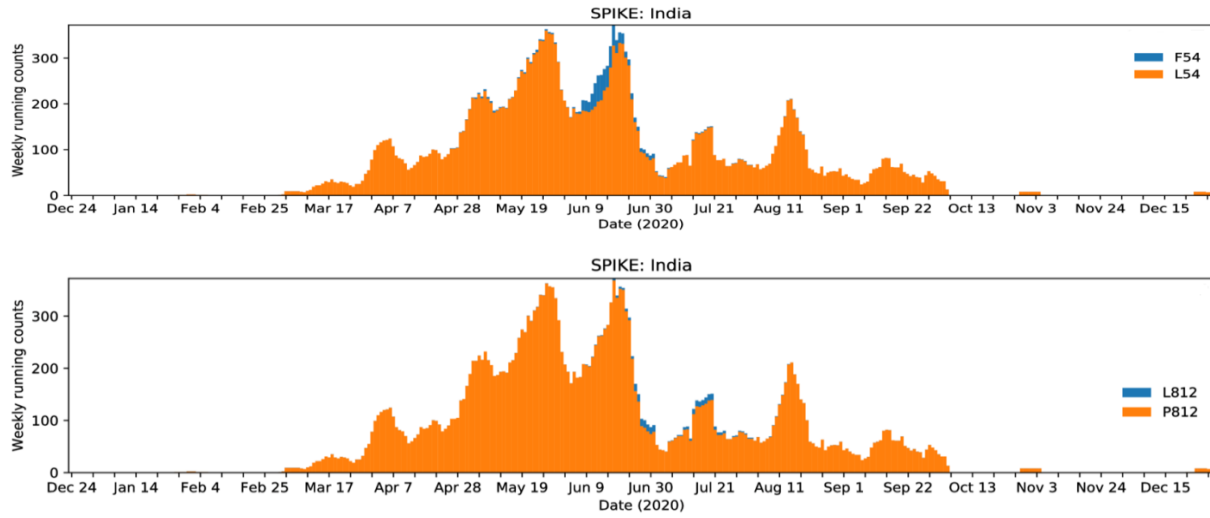

**Figure 5**

**N - linked and O - linked Glycosylation sites in spike protein**

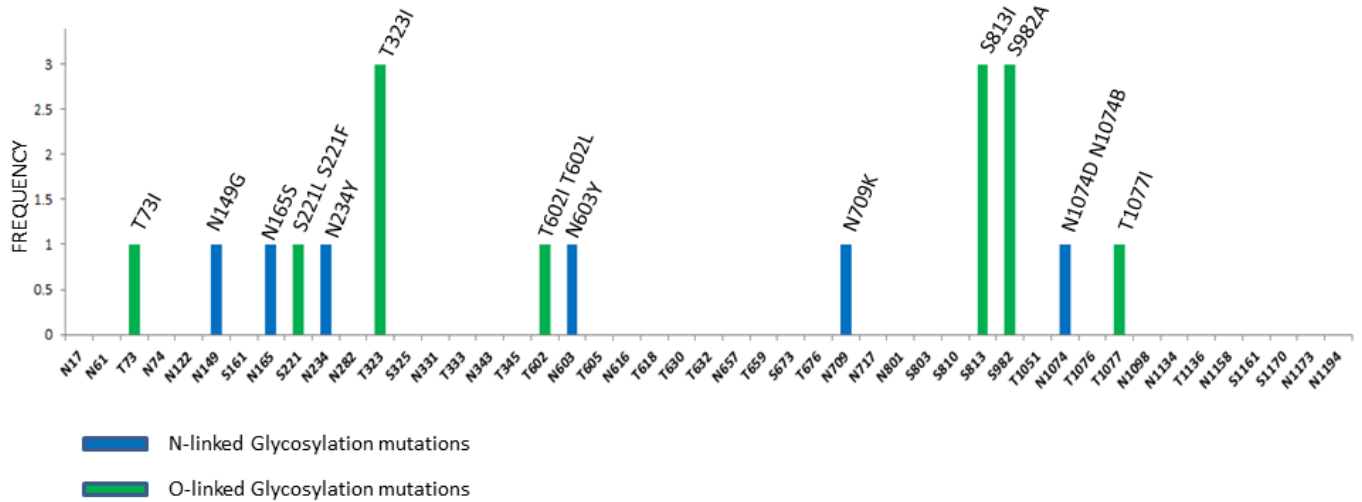

**Figure 6**

| <b>Region</b> | <b>Position</b> | <b>Number<br/>of mutation sites</b> | <b>Number<br/>of mutations</b> |
|---------------|-----------------|-------------------------------------|--------------------------------|
|---------------|-----------------|-------------------------------------|--------------------------------|

hC  
hCoV-1  
hCoV  
  
hCoV  
hCoV-19/India  
  
hCoV-19/Ind  
  
hCoV  
r

**Table 1**

---

|                         |             |     |     |
|-------------------------|-------------|-----|-----|
| Signal Peptide          | 1 - 13      | 7   | 9   |
| N-Terminal Domain       | 14 - 305    | 144 | 211 |
| Receptor Binding Domain | 319 - 541   | 53  | 63  |
| Protease Cleavage Site  | 675 - 692   | 8   | 11  |
| Fusion Peptide          | 788 - 806   | 6   | 6   |
| HR1                     | 912 - 984   | 24  | 31  |
| HR2                     | 1163 - 1213 | 15  | 18  |
| Transmembrane Domain    | 1214 - 1237 | 13  | 16  |
| Cytoplasm Domain        | 1238 - 1273 | 12  | 13  |

---

**Table 2**

---

|                 |                 |                 |                 |
|-----------------|-----------------|-----------------|-----------------|
| <b>N-linked</b> | <b>Mutation</b> | <b>O-linked</b> | <b>Mutation</b> |
|-----------------|-----------------|-----------------|-----------------|

---

| <b>Glycosylation Site<br/>(NGS)</b> |                | <b>Glycosylation<br/>(OGS)</b> | <b>Site</b>  |
|-------------------------------------|----------------|--------------------------------|--------------|
| N17                                 | -              | T73                            | T73I         |
| N61                                 | -              | S161                           | -            |
| N74                                 | -              | S221                           | S221, S221F  |
| N122                                | -              | T323                           | T323I        |
| N149                                | N149G          | S325                           | -            |
| N165                                | N165S          | T333                           | -            |
| N234                                | N234Y          | T345                           | -            |
| N282                                | -              | T602                           | T602I, T602L |
| N331                                | -              | T605                           | -            |
| N343                                | -              | T618                           | -            |
| N603                                | N603Y          | T630                           | -            |
| N616                                | -              | T632                           | -            |
| N657                                | -              | T659                           | -            |
| N709                                | N709K          | S673                           | -            |
| N717                                | -              | T676                           | -            |
| N801                                | -              | S803                           | -            |
| N1074                               | N1074D, N1074B | S810                           | -            |
| N1098                               | -              | S813                           | S813I        |
| N1134                               | -              | S982                           | S982A        |
| N1158                               | -              | T1051                          | -            |
| N1173                               | -              | T1076                          | -            |
| N1194                               | -              | T1077                          | T1077I       |
|                                     |                | T1136                          | -            |
|                                     |                | S1161                          | -            |
|                                     |                | S1170                          | -            |
|                                     |                | S1175                          | -            |
